# Supplementary material for: Development of a Single-Chain Variable Fragment of CR3022 for a Plasmonic-Based Biosensor Targeting the SARS-CoV-2 Spike Protein
Source: MDPI journal article supplement (doi:10.3390/bios12121133), 2022-12-06
Supplement: s1 [file s1]

# Development of a Single-Chain Variable Fragment of CR3022 for a Plasmonic-Based Biosensor Targeting the SARS-CoV-2 Spike Protein

Taufik Ramdani Tohari <sup>1</sup>, Isa Anshori <sup>2,3,\*</sup>, Umi Baroroh <sup>1,4</sup>, Antonius Eko Nugroho <sup>2</sup>, Gilang Gumilar <sup>3,5,6</sup>, Shinta Kusumawardani <sup>1</sup>, Sari Syahrani <sup>1</sup>, Brian Yulianto <sup>3,5</sup>, Wyanda Arnafia <sup>7</sup>, Irvan Faizal <sup>8,9</sup>, Yeni Wahyuni Hartati <sup>1,10</sup>, Toto Subroto <sup>1,10</sup> and Muhammad Yusuf <sup>1,10,\*</sup>

<sup>1</sup> Research Center for Molecular Biotechnology and Bioinformatics, Universitas Padjadjaran, Bandung 40133, Indonesia

<sup>2</sup> Lab-on-Chip Group, Biomedical Engineering Department, Institute of Technology, Bandung 40132, Indonesia

<sup>3</sup> Research Center for Nanoscience and Nanotechnology (RCNN), Institut Teknologi Bandung, Bandung 40132, Indonesia

<sup>4</sup> Department of Biotechnology, Indonesian School of Pharmacy, Bandung 40266, Indonesia

<sup>5</sup> Advanced Functional Material Research Group, Faculty of Industrial Technology, Institut Teknologi Bandung, Bandung 40132, Indonesia

<sup>6</sup> Research and Development Division, PT. Biostark Analitika Inovasi, Bandung 40375, Indonesia

<sup>7</sup> Research and Development Division, PT. Tekad Mandiri Citra, Bandung 40292, Indonesia

<sup>8</sup> Centre for Vaccine and Drug Research, National Research and Innovation Agency Republic of Indonesia, Kawasan Puspiptek Serpong, Tangerang Selatan 15314, Indonesia

<sup>9</sup> Department of Biotechnology, Faculty of Biotechnology, Atma Jaya Catholic University of Indonesia, BSD Campus, Tangerang 15345, Indonesia

<sup>10</sup> Department of Chemistry, Faculty of Mathematics and Natural Sciences, Universitas Padjadjaran, Jatinangor 45363, Indonesia

\* Correspondence: isaa@staff.stei.itb.ac.id (I.A.); m.yusuf@unpad.ac.id (M.Y.)

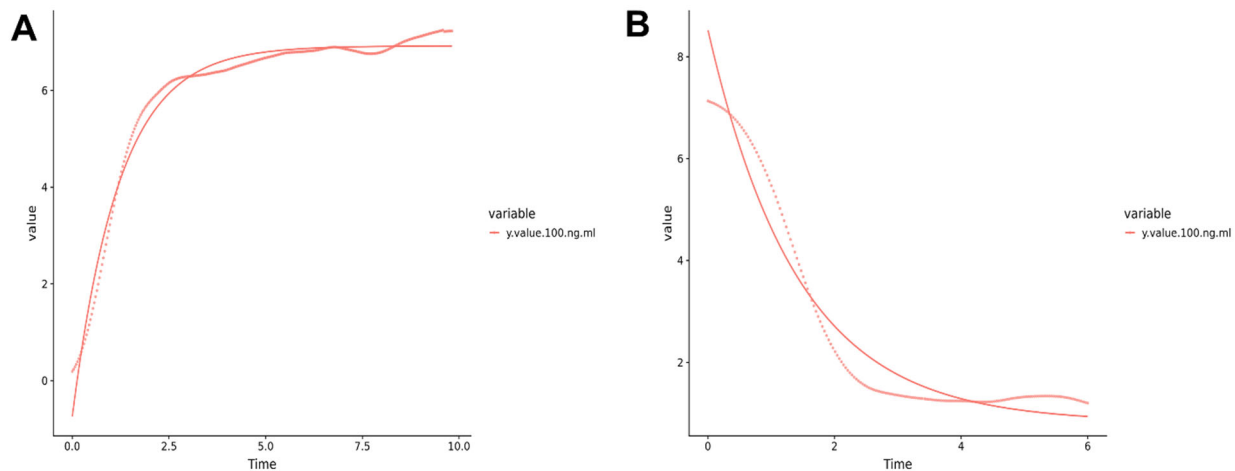

**Figure S1.** Kinetic analysis of association (A) and dissociation (B) curves of IgY-SARS-CoV-RBD 100 ng/ml by software anabel version 2.2.3

**Table S1.** Obtained parameters of IgY kinetic analysis using single curve analysis method in Anabel 2.2.3

| Spot              | c(Reagent) [M] | $k_{\text{obs}}$ | $k_{\text{diss}}$ [1/ min.] | $k_{\text{ass}}$ [1/ min. M] | KD [M]   |
|-------------------|----------------|------------------|-----------------------------|------------------------------|----------|
| y.value.100.ng/ml | 2.78E-09       | 0.822231         | 0.703297                    | 42816122                     | 1.64E-08 |

$k_{\text{obs}}$ : Observation rate,  $k_{\text{diss}}$ : dissociation rate,  $k_{\text{ass}}$ : association rate, and KD: dissociation constant
